# Supplementary material for: WITHDRAWN: Natural Killer Cell-Mediated Immunosurveillance Drives Liver Cancer Evolution Through Cancer Stemness Enhancement and Lipid Metabolism Reprogramming
Source: Research Square preprint supplement (doi:10.21203/rs.3.rs-6840080/v1), 2025-07-15
Supplement: Supplementary file 2 [file e6e6e1cdf6642a22fd736df9.xlsx]

## Sheet: Sheet1
Supplementary Table 1. Gene lists of published signatures.
Signatures	NK activation ligand	Liver epithelial cell phenotype	HCC stemness	NK score	NK cell phenotype			CD8+ T cell phenotype
Reference	Nicholas D. et al., 2022 Nat Rev Cancer (PMID: 32581320)	Xue et al., 2022 Nature (PMID:36352227)	Kouki et al., 2017 Mol Cancer (PMID: 28137313)	Xue et al., 2022 Nature (PMID:36352227)	Xue et al., 2022 Nature (PMID:36352227)			Chu et al., 2023 Nat Med (PMID:37248301)
Gene Lists	MICA	ADH4	CD24	PLCG2	NK_01_FCGR3A_CX3CR1	NK_02_FCGR3A_CXCR4	NK_03_FCGR3A_IFNG	Exhaustion	Activation Effector function	TCR Signaling
	MICB	AFM	PROM1	GZMA	FGFBP2	GZMB	IFNG	PDCD1	FAS	CALM1
	ULBP1	AHSG	EPCAM	GNLY	GZMB	FGFBP2	FGFBP2	LAYN	FASLG	CALM2
	ULBP2	AMBP	CD44	FGFBP2	GNLY	GNLY	GNLY	HAVCR2	CD44	CALM3
	ULBP3	C4BPB	THY1	GZMB	NKG7	NKG7	NKG7	LAG3	CD69	CAST
	RAET1E	C6	ICAM1	NKG7	PRF1	PRF1	GZMB	CD244	CD38	CD247
	RAET1G	CYP2E1	CD47	PRF1	SPON2	SPON2	SPON2	CTLA4	NKG7	CD3D
	RAET1L	CYP4F2	LGR5	IFNG	KLRD1	KLRD1	KLRD1	LILRB1	KLRB1	CD3E
	NCR3LG1	F9		SPON2	MYOM2	CST7	PRF1	TIGIT	KLRD1	CD3G
	BAG6	FGA		KLRC1	GZMH	GZMH	CD69	TOX	KLRF1	CSK
	PVR	FGB			CLIC3	KLRF1	KLRF1	VSIR	KLRG1	DOK1
	ICAM1	FGG			CTSW	CD247	DNAJB1	BTLA	KLRK1	DOK2
	HHLA2	GC			KLRF1	MYOM2	CD247	ENTPD1	FCGR3A	FYN
	CD58	HPX			CST7	CLIC3	CST7	CD160	CX3CR1	LCK
	NECTIN2	PROC			CD247	CTSW	HSPA1A	LAIR1	CD300A	NFATC2
	HLA-E	SAA4			HOPX	KLRB1	GZMH		FGFBP2	NFATC1
	HLA-DPB1	SERPINA6			CX3CR1	GZMM	CLIC3		ID2	NFATC4
		SERPINC1			GZMM	PLAC8	CTSW		ID3	NFATC3
		SERPIND1			PLAC8	FCGR3A	MYOM2		PRDM1	PLEK
					ABHD17A	CCL5	BPGM		RUNX3	PAG1
					CCL5	S1PR5	CCL5		TBX21	PTPN11
					GZMA	TRDC	PLAC8		ZEB2	PTPN2
					FCGR3A	GZMA	FCGR3A		BATF	PTPN22
					TRDC	HOPX	KLRB1		IRF4	PTPN4
					TXNIP	DTHD1	HOPX		NR4A1	PTPN6
					CEP78	CD7	GZMM		NR4A2	PTPN7
					SAMD3	CCL4	PYHIN1		NR4A3	PTPRC
					HCST	SYTL3	HSP90AA1		PBX3	PTPRCAP
					PYHIN1	TXK	CACYBP		ZNF683	S100A10
					KLRB1	ARL4C	CCL4		HOPX	S100A11
					CMC1	EFHD2	HSPA6		FOS	S100A13
					BIN2	MATK	HSPA1B		FOSB	S100A4
					TXK	ADGRG1	HSPH1		JUN	S100A6
					S1PR5	PYHIN1	HSPE1		JUNB	ZAP70
					PRMT2	LAIR2	HSPA8		JUND	DUSP1
					LAIR2	ABHD17A	DOK2		STAT1	DUSP2
					IFITM1	SH2D2A	HSPD1		STAT2	DUSP4
					ADGRG1	CX3CR1	KLF2		STAT5A	DUSP5
					PTGDR	HCST	DNAJA1		STAT6	DUSP10
					TRAF3IP3	ZEB2	JUN		STAT4	LAT
					GIMAP7	ANXA1	SLC5A3		EOMES	PLCG1
					RAP1B	AKNA	DUSP2			PLCG2
					CD7	CMC1	PMAIP1			PPP3CA
					EFHD2	GNG2	ANXA1			PPP3CC
					ITGB2	APOA2	PPP1R15A			FOS
					TTC38	RUNX3	PTGDS			FOSB
					CCND3	ALB	CMC1			FOSL1
					MBP	APOC3	ZFAND2A			FOSL2
					C12orf75	APOA1	CHORDC1			JUN
					PLCG2	METRNL	MRPL18			JUNB
					PTGDS	PTGDS	NEU1			JUND
										NR4A1
										NR4A2
										NR4A3
										BATF
										IRF4
										SH2D2A
